# Supplementary material
Source: publisher site journal article supplement (https://www.spandidos-publications.com/8406/downloadSupplementary)
Supplement: Supplementary file 1 [file downloadSupplementary]

## Sheet: Sheet1
Table SV. Differential glycolysis-related genes.
gene_name	baseMean	log2FoldChange	lfcSE	stat	pvalue	padj	sig
GALE	2237.65	1.61959	0.0874346	18.5234	1.33747e-76	6.46007e-75	up
STMN1	11425.4	1.78913	0.0987975	18.1091	2.70125e-73	1.17946e-71	up
SLC2A1	6907.26	1.52345	0.10335	14.7407	3.531e-49	7.31917e-48	up
ARTN	266.5	3.21034	0.154489	20.7805	6.50395e-96	5.21383e-94	up
PGM1	4137.39	-1.25624	0.0812969	-15.4525	7.25521e-54	1.73213e-52	down
AK4	2995.45	-1.02442	0.120883	-8.47446	2.36165e-17	1.3092e-16	down
DEPDC1	686.887	3.28173	0.126956	25.8494	2.47217e-147	5.88376e-145	up
EFNA3	717.364	1.96644	0.134277	14.6446	1.45886e-48	2.95725e-47	up
LHX9	13.8479	3.15289	0.324042	9.72989	2.2484e-22	1.59898e-21	up
PPFIA4	277.062	1.55527	0.152079	10.2267	1.50552e-24	1.19335e-23	up
SDC1	22540.2	1.92402	0.114295	16.8338	1.37994e-63	4.36544e-62	up
CENPA	433.863	3.27943	0.128069	25.6067	1.28452e-144	2.90655e-142	up
UGP2	8005.31	-1.27877	0.0615462	-20.7773	6.93948e-96	5.54362e-94	down
LCT	47.2025	1.51541	0.262314	5.77708	7.60099e-09	2.50786e-08	up
CXCR4	5251.02	1.14403	0.101772	11.2411	2.56143e-29	2.50814e-28	up
CHPF	8106.35	1.43919	0.0822564	17.4964	1.52535e-68	5.68252e-67	up
NUP210	7555.52	1.9174	0.0799178	23.9922	3.3545e-127	5.60311e-125	up
PFKFB4	748.423	1.31236	0.0727277	18.0449	8.65319e-73	3.71473e-71	up
ADH4	16.1476	-3.70751	0.233122	-15.9037	5.97245e-57	1.56944e-55	down
ADH6	14.3857	-1.20559	0.13951	-8.64156	5.54496e-18	3.17188e-17	down
ADH1A	16.8202	-4.82094	0.219202	-21.9931	3.3523e-107	3.60619e-105	down
ADH1B	9453.41	-5.1206	0.251319	-20.3749	2.79031e-92	2.07731e-90	down
ADH1C	161.779	-3.3556	0.214842	-15.6189	5.41423e-55	1.34504e-53	down
SAP30	710.558	1.10575	0.0794443	13.9185	4.8878e-44	8.40885e-43	up
VCAN	21793.9	1.57106	0.121049	12.9787	1.61688e-38	2.28734e-37	up
KIF20A	1685.64	3.38222	0.114479	29.5444	7.74558e-192	6.13423e-189	up
HMMR	774.485	3.03543	0.104653	29.0046	5.75686e-185	3.67272e-182	up
IER3	2376.41	1.34889	0.121462	11.1054	1.18094e-28	1.12193e-27	up
PGK2	2.10378	3.3022	0.401901	8.21644	2.09641e-16	1.11094e-15	up
ME1	1508.75	-1.5919	0.14334	-11.1057	1.17629e-28	1.11774e-27	down
NT5E	1307.57	-1.24759	0.104677	-11.9185	9.48403e-33	1.06932e-31	down
RRAGD	1083.27	-1.23027	0.114629	-10.7326	7.15522e-27	6.27468e-26	down
EGFR	4218.84	-1.84465	0.167781	-10.9944	4.06605e-28	3.77771e-27	down
CLDN3	4684.23	1.43366	0.139437	10.2818	8.5126e-25	6.81453e-24	up
MET	1928.67	-1.6345	0.137492	-11.8879	1.36741e-32	1.53122e-31	down
GFUS	6749.25	1.80958	0.0835663	21.6545	5.51823e-104	5.46281e-102	up
VLDLR	1043.95	-1.85327	0.114983	-16.1178	1.91379e-58	5.23573e-57	down
FBP1	2465.79	1.04121	0.122764	8.48137	2.22564e-17	1.23484e-16	up
COL5A1	28129.7	1.91758	0.115072	16.6642	2.38565e-62	7.27158e-61	up
PFKFB3	9151.56	-1.9819	0.103621	-19.1265	1.51999e-81	8.37159e-80	down
CDK1	2616.65	3.16002	0.105018	30.0902	6.51668e-199	6.23619e-196	up
P4HA1	4850.12	1.0222	0.0820887	12.4524	1.35753e-35	1.72019e-34	up
LDHC	48.4763	1.05531	0.21597	4.88639	1.02702e-06	2.83624e-06	up
CHST1	1217.64	1.95093	0.16565	11.7774	5.10653e-32	5.57555e-31	up
PC	2816.67	-1.52752	0.0964682	-15.8344	1.80141e-56	4.667e-55	down
PPP2R1B	2428.08	-1.45186	0.0709891	-20.4519	5.78074e-93	4.34586e-91	down
B3GAT1	177.105	-1.16404	0.219619	-5.30027	1.1563e-07	3.46173e-07	down
FKBP4	17203.5	1.44053	0.0795763	18.1025	3.04364e-73	1.3277e-71	up
GAPDH	72773.8	1.0936	0.0806953	13.5522	7.68626e-42	1.21913e-40	up
ENO2	2802.1	1.52763	0.12203	12.5185	5.91692e-36	7.58548e-35	up
GYS2	1.16898	-4.94514	0.340024	-14.5435	6.42195e-48	1.26658e-46	down
DCN	45890.6	-1.99054	0.120142	-16.5683	1.18175e-61	3.5157e-60	down
ALDH2	6229.76	-2.27364	0.107697	-21.1114	6.24565e-99	5.48543e-97	down
IRS2	2636.68	-1.45055	0.122051	-11.8848	1.42012e-32	1.58908e-31	down
EGLN3	2740.05	1.62061	0.136671	11.8577	1.96201e-32	2.1811e-31	up
PYGL	3972.9	-1.24637	0.117308	-10.6248	2.28623e-26	1.96291e-25	down
FUT8	4364.26	1.04287	0.0907593	11.4905	1.47189e-30	1.51523e-29	up
ISG20	1273.06	1.1885	0.107439	11.0621	1.91576e-28	1.80325e-27	up
ALDH1A3	757.792	-1.60119	0.139143	-11.5075	1.20975e-30	1.25127e-29	down
POLR3K	1549.77	1.5266	0.0694486	21.9817	4.31326e-107	4.61559e-105	up
CACNA1H	2183.22	2.33739	0.188425	12.4049	2.45837e-35	3.08448e-34	up
PGP	1045.64	1.31547	0.0761551	17.2735	7.44451e-67	2.61835e-65	up
CLDN9	66.6661	2.36903	0.173861	13.626	2.80532e-42	4.53732e-41	up
ALDOA	571.508	1.1271	0.096734	11.6515	2.25433e-31	2.40145e-30	up
CHST6	197.6	2.26205	0.158322	14.2877	2.61229e-46	4.87975e-45	up
SLC2A4	272.727	-4.64005	0.144674	-32.0724	1.07147e-225	2.23713e-222	down
ALDH3A1	103.611	-1.50842	0.253226	-5.95681	2.57203e-09	8.78719e-09	down
ALDOC	885.562	-1.94796	0.141364	-13.7798	3.37274e-43	5.63563e-42	down
SLC4A1	5.31799	-2.11962	0.215453	-9.83798	7.72491e-23	5.63053e-22	down
SLC25A10	637.43	1.26674	0.103556	12.2324	2.08581e-34	2.5313e-33	up
SLC16A3	2010.03	2.15677	0.116583	18.4998	2.07256e-76	9.91677e-75	up
ANGPTL4	1415.02	-1.88399	0.163898	-11.4949	1.39959e-30	1.44243e-29	down
GAPDHS	1.69471	1.07631	0.276101	3.89825	9.68913e-05	0.000218467	up
ACSS2	3128.59	-1.69424	0.0669146	-25.3194	1.95322e-141	4.23204e-139	down
SPAG4	321.341	1.61385	0.115821	13.9341	3.9319e-44	6.80256e-43	up
AURKA	1464.51	3.11772	0.110159	28.302	3.26398e-176	1.54565e-173	up
PCK1	639.565	-4.91194	0.262965	-18.679	7.33152e-78	3.66847e-76	down
TFF3	15200.1	2.59685	0.228741	11.3528	7.18048e-30	7.21094e-29	up
GAL3ST1	22.6066	-1.05905	0.169464	-6.24937	4.12111e-10	1.49231e-09	down
KDELR3	2421.49	1.11101	0.100718	11.0309	2.7125e-28	2.53708e-27	up
BIK	768.452	1.63282	0.116726	13.9885	1.83345e-44	3.21319e-43	up
MIOX	10.5586	2.24144	0.183188	12.2357	2.00318e-34	2.43294e-33	up
PFKFB1	175.47	-3.56224	0.143338	-24.852	2.46124e-136	4.81084e-134	down
GPC4	3684.21	1.12223	0.120435	9.31814	1.18397e-20	7.7681e-20	up
GPC3	2332.59	-2.51803	0.17827	-14.1248	2.67131e-45	4.84422e-44	down
TKTL1	6.63224	-1.2312	0.204987	-6.00623	1.89892e-09	6.54646e-09	down
